# Supplementary material for: To probe the structure of methanol and Aerosol OT (AOT) in AOT reverse micelles by FTIR measurements
Source: Royal Society of Chemistry journal article supplement (doi:10.1039/b818021k), 2009-01-01
Supplement: b818021k.pdf [file b818021k.pdf]

## Supporting Information

TO PROBE THE STRUCTURE OF METHANOL AND AEROSOL OT (AOT) IN  
AOT REVERSE MICELLES BY FTIR MEASUREMENTS

Palash Setua, Debabrata Seth<sup>+</sup> and Nilmoni Sarkar\*

Department of Chemistry  
Indian Institute of Technology,  
Kharagpur 721 302, WB, INDIA.

**E-mail : [nilmoni@chem.iitkgp.ernet.in](mailto:nilmoni@chem.iitkgp.ernet.in); Fax : 91-3222-255303**

<sup>+</sup>Indian Institute of Technology Patna, Navin Government Polytechnic Campus  
Patliputra Colony, Patna 800 013, Bihar, India.

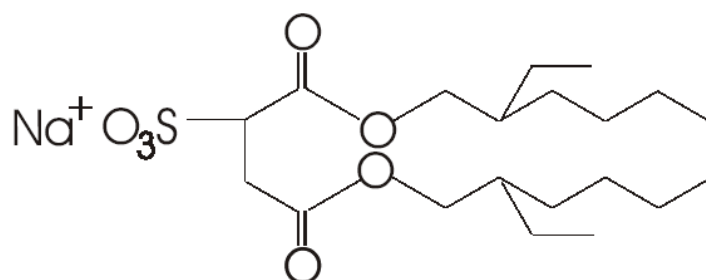

**Fig. S1.** Structure of AOT molecule.

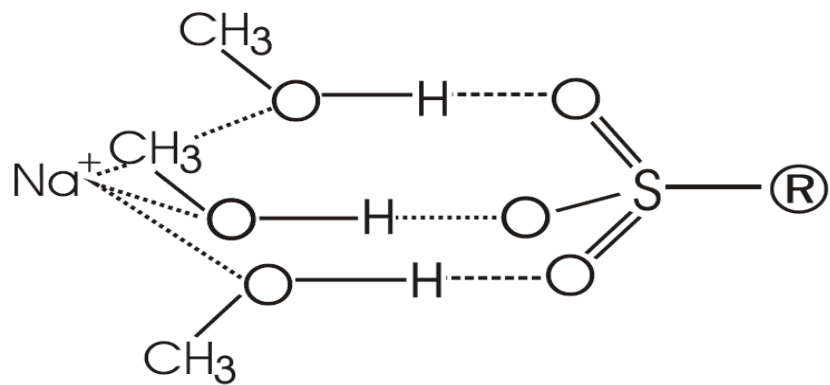

**Fig. S2.** Hydrogen bonded coordination structure of AOT molecule with Na<sup>+</sup> ion by bridging methanol molecule.

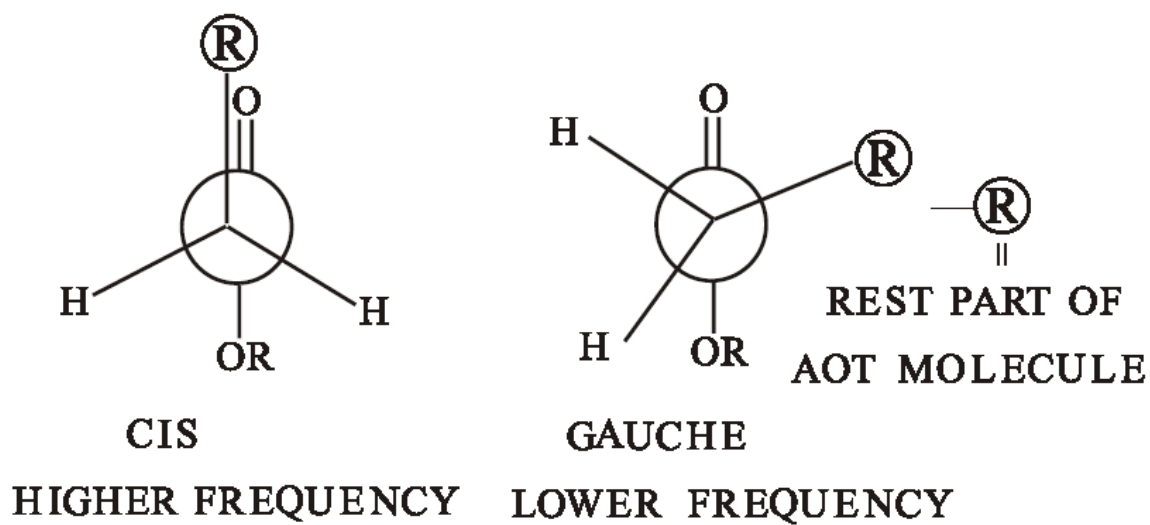

**Fig. S3.** Different infrared carbonyl stretches for different conformation along C(O)-C bond. Peak around  $1718\text{ cm}^{-1}$  for gauche and  $1738\text{ cm}^{-1}$  for the cis.

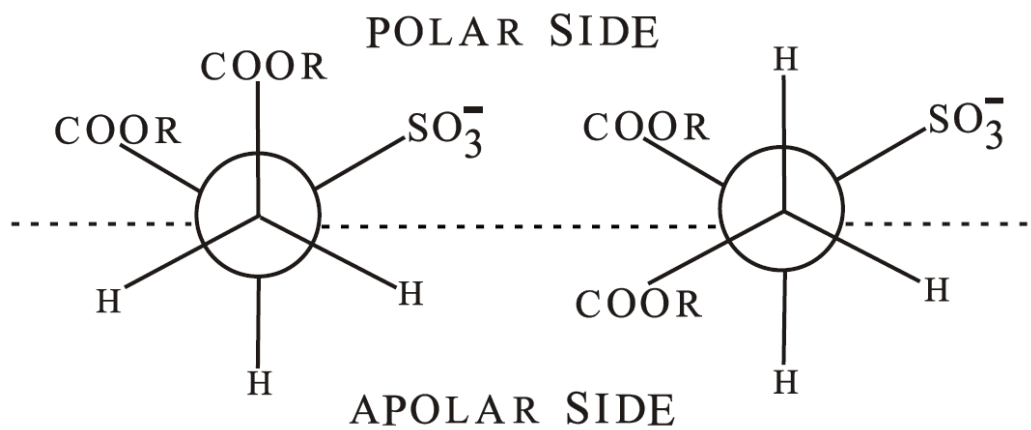

**Fig. S4.** Different possible stereospecific orientation of the three polar group at polar/apolar interface for different rotamers of AOT. Rotation is considered along the C-C bond of succinic acid skeleton.

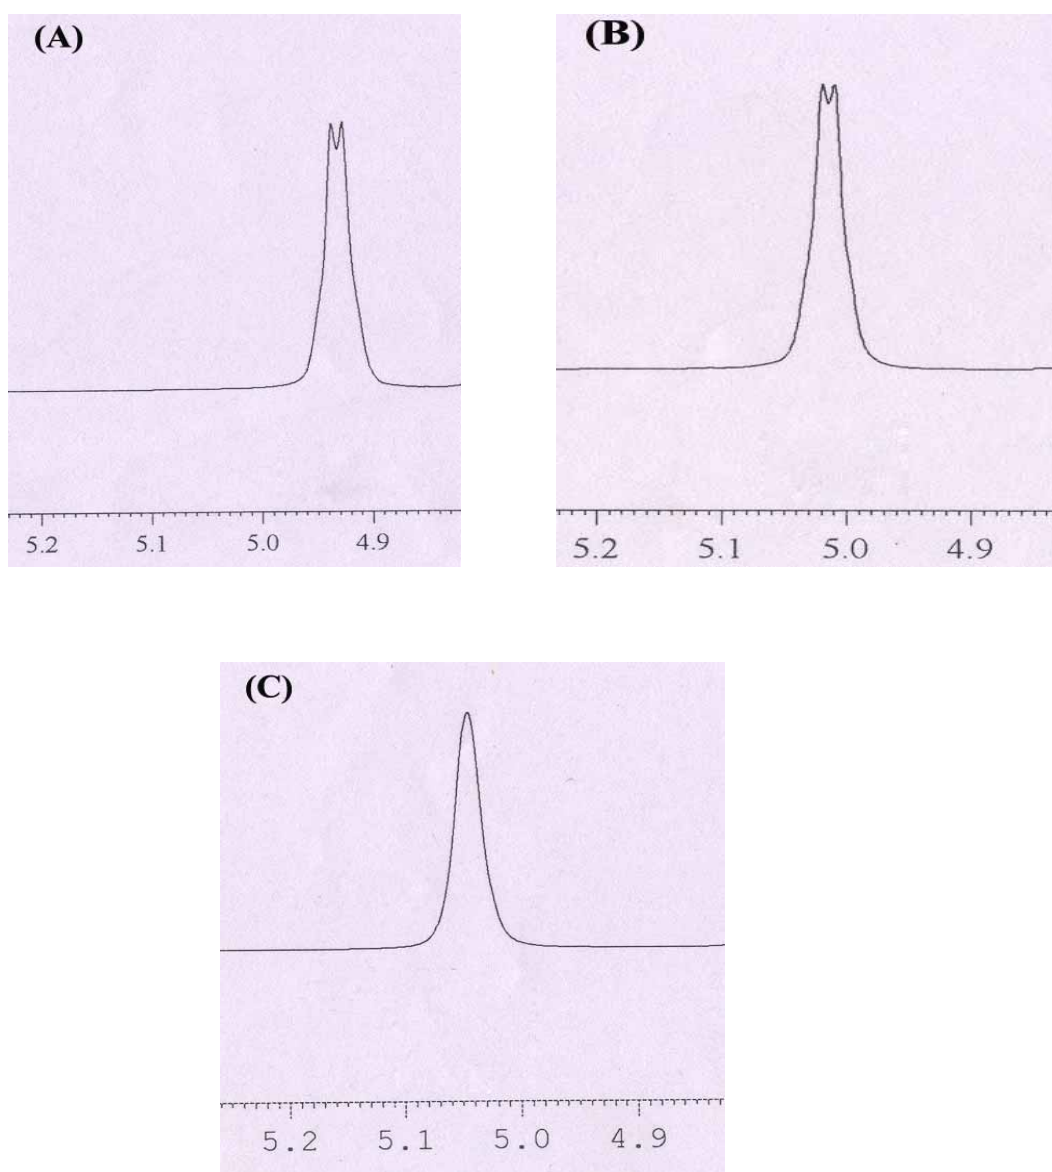

**Fig. S5.** <sup>1</sup>H-NMR spectra of methanol -OH proton in methanol/AOT/n-heptane reverse micellar medium where (A), (B) and (C) represent  $w=6$ ,  $w=8$  and  $w=9$  respectively.

Peak position is shifting to higher ppm value with increasing  $w$  value. Splitting of the peak is observed up to  $w \leq 8$ . Probable reason for this may be higher percentage of methanol, which remain hydrogen bonded with the sulfonate head group.

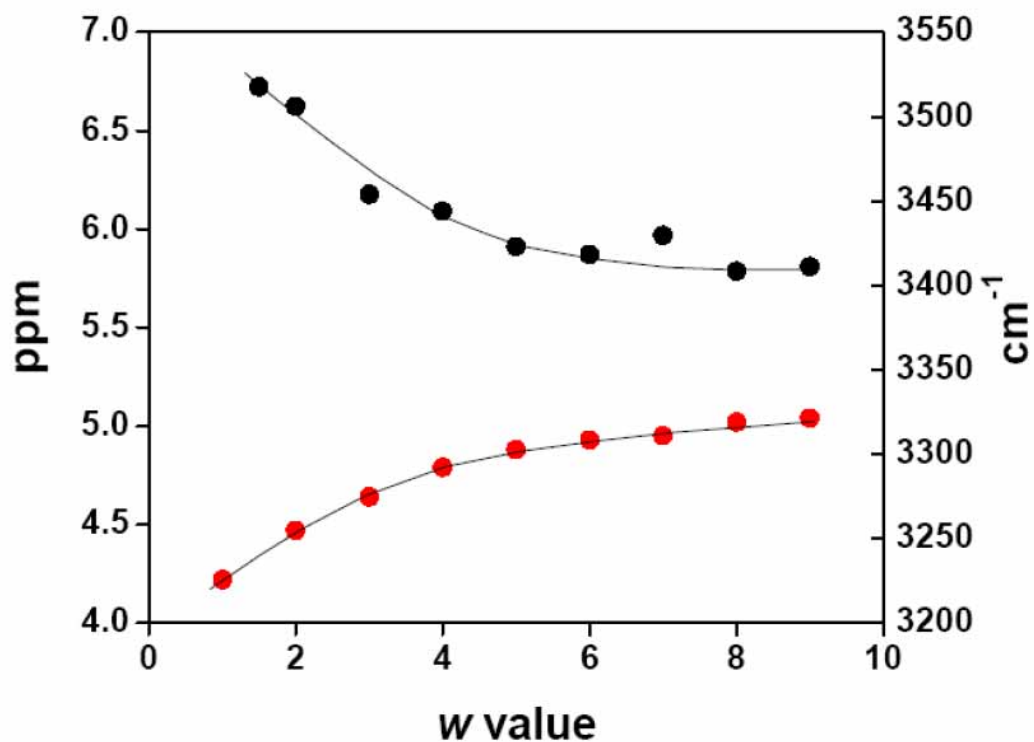

**Fig. S6.** Variation of O-H stretching frequency of methanol and NMR ppm value of OH proton in methanol/AOT/n-heptane reverse micellar system. Red points indicate the variation of ppm value and black points represent the O-H stretch variation. Black lines are drawn as the reference to eye.

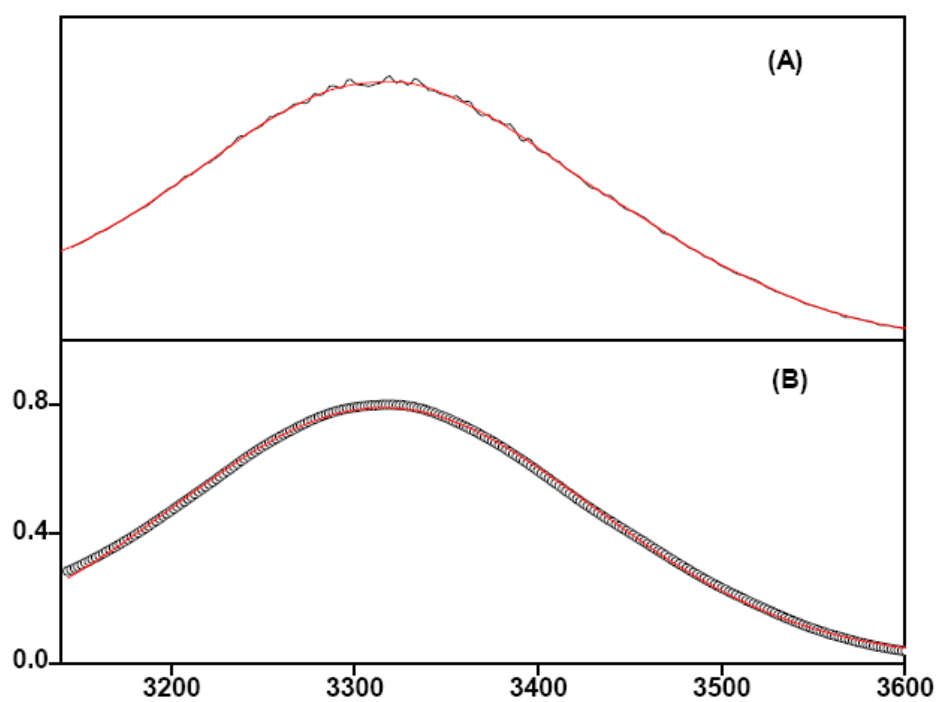

**Fig. S7.** Infrared spectra of -OH stretching frequency region of pure methanol. (A) Represent the smoothing of the spectra (black-original, red-fitted result) (B) Gaussian curve fitting to the O-H stretch (black circle smoothed spectra, red line single Gaussian curve fitting).

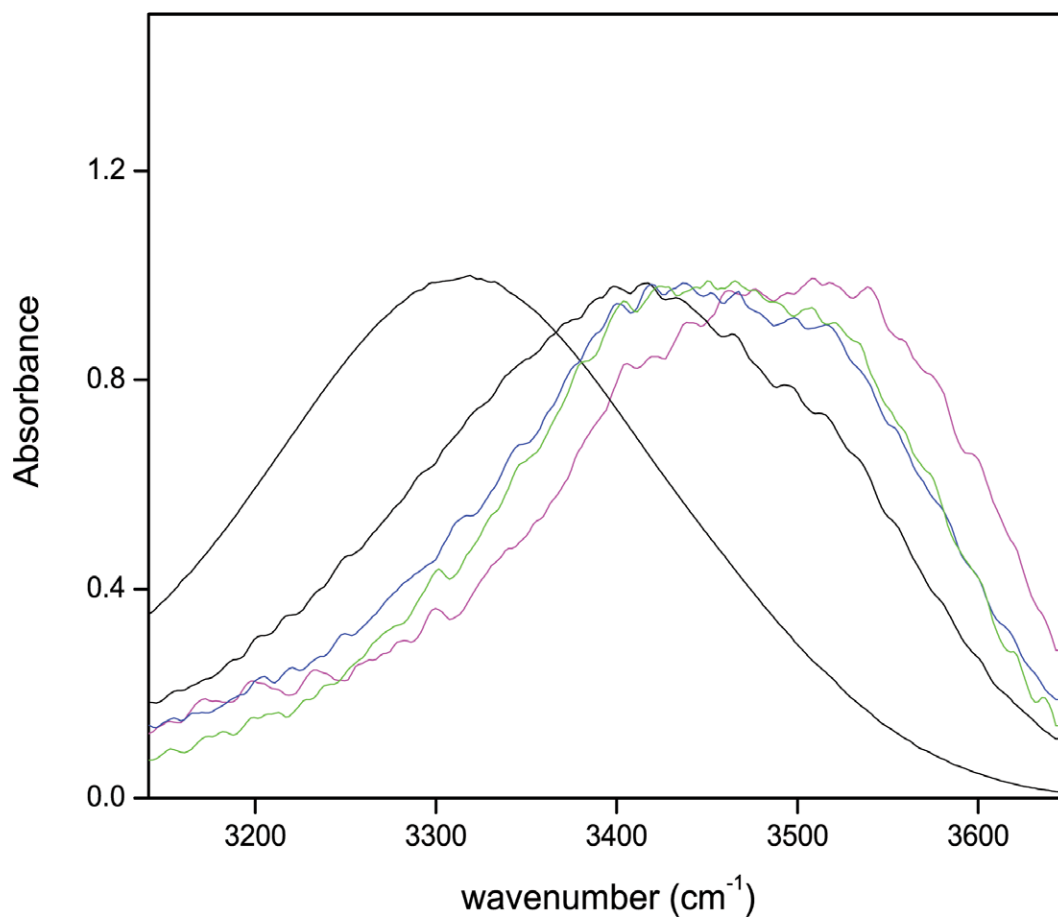

**Figure S8.** Raw spectra (not smoothed) of O-H stretching band of pure methanol(black) and methanol in methanol/AOT/n-heptane reverse micellar system at different  $w$  values,  $w=2$ (magenta),  $w=4$ (blue),  $w=7$ (green) and  $w=9$ (black).
